# Supplementary material for: Multi‐miRNA panel of tumor‐derived extracellular vesicles as promising diagnostic biomarkers of early‐stage breast cancer
Source: PubMed Central journal article supplement — Cancer Sci. 2021 Oct 27;112(12):5078–87. doi: 10.1111/cas.15155 (PMC8645748; doi:10.1111/cas.15155), 2021-10-27
Supplement: CAS-112-5078-s001.pdf [file CAS-112-5078-s001.pdf]

Supplementary figures

## **Multi-miRNAs panel of tumor-derived extracellular vesicles as promising diagnostic biomarkers of early-stage breast cancer**

Min Woo Kim <sup>1,†</sup>, Sunyoung Park <sup>2,†</sup>, Hyojung Lee <sup>1</sup>, Hogyong Gwak <sup>2</sup>, Kyung-A Hyun <sup>2</sup>, Jee Ye Kim <sup>1</sup>, Hyo-II Jung <sup>2, \*</sup>, and Seung Il Kim <sup>1,\*</sup>

<sup>1</sup> Yonsei University College of Medicine, Seoul, Republic of Korea

<sup>2</sup> School of Mechanical Engineering, Yonsei University, Seoul, Republic of Korea

† These authors contributed equally to this work.

\* Please send Correspondence to:

**Seung Il Kim – Professor, M.D./Ph.D.**

Department of Surgery, Yonsei University College of Medicine, 50-1 Yonsei-ro, Seodaemun-gu, Seoul 03722, Republic of Korea

Tel. +82-2-2228-0900 / Fax. +82-2-313-8289 / E-mail. [SKIM@yuhs.ac](mailto:SKIM@yuhs.ac)

**Hyo-II Jung – Professor, Ph.D.**

School of Mechanical Engineering, Yonsei University, 50 Yonsei-ro, Seodaemun-gu, Seoul 03722, Republic of Korea

Tel. +82-2-2123-7767 / Fax. +82-2-312-2821 / E-mail. [URIDLE7@yonsei.ac.kr](mailto:URIDLE7@yonsei.ac.kr)

**Keywords:** biomarker; extracellular vesicles; microRNA; early-stage breast cancer; liquid biopsy

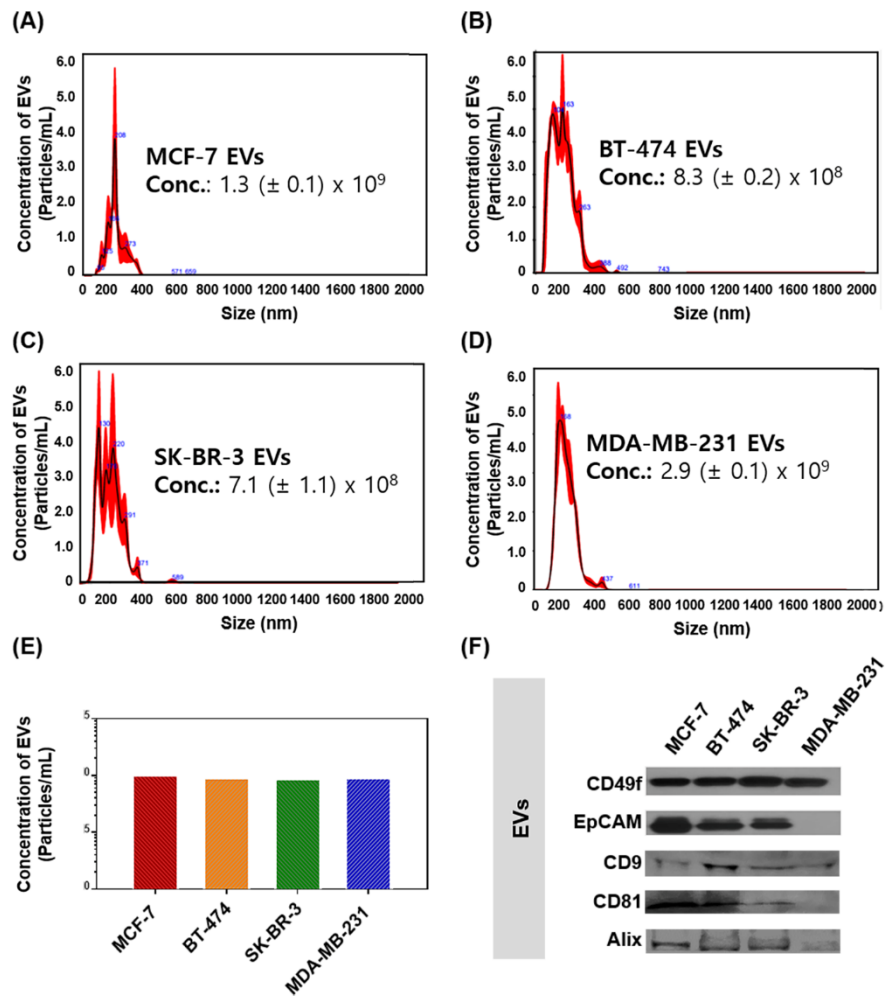

**Figure S1.** Nanoparticle tracking analysis (NTA) quantification of extracellular vesicles (EVs) released from media of breast cancer cell lines. (A) NTA distribution of MCF-7 EVs. (B) NTA distribution of BT-474 EVs. (C) NTA distribution of SK-BR-3 EVs. (D) NTA distribution of MDA-MB-231 EVs. (E) Measurement of EVs amounts by NTA. (F) Western blot analysis of EpCAM, CD49f, CD9, CD81, and Alix on EVs.

(A)

|         | miR-484 | miR-let7a | miR-16 |
|---------|---------|-----------|--------|
| miR-16  | 0.92*   | 0.27      | 0.00   |
| miR-21  | 0.99*   | 0.91      | 0.96*  |
| miR-9   | 0.82    | 0.05      | 0.46   |
| miR-429 | 0.99**  | 0.73      | 0.99** |
| miR-96  | 0.50    | 0.43      | 0.53   |
| miR-155 | 0.25    | 0.19      | 0.28   |
| miR-128 | 0.25    | 0.99*     | 0.00   |

(B)

|         | miR-484 | miR-let7a | miR-16 |
|---------|---------|-----------|--------|
| miR-16  | 0.03*   | 0.73      | 1.00   |
| miR-21  | 0.02*   | 0.09      | 0.04*  |
| miR-9   | 0.28    | 1.00      | 1.00   |
| miR-429 | 0.001** | 0.14      | 0.01** |
| miR-96  | 0.49    | 0.57      | 0.47   |
| miR-155 | 0.50    | 0.57      | 0.47   |
| miR-128 | 0.50    | 0.001**   | 1.00   |

(non-correlation) 0  1 (correlation)  
Pearson *r*

(non-significant) 1  0 (significant)  
*P*-value

**Figure S2.** Evaluation of endogenous controls for comparing microRNA (miRNA) expression levels between breast cancer cells (BT-474, MCF-7, SK-BR-3, and MDA-MB-231) and their EVs. (A) Heat map of correlations between miRNA expression in cell lines and cell-derived EVs for miR-16, miR-21, miR-9, miR-429, miR-96, miR-155, miR-128, and miR-let-7a normalized by miR-484, miR-let7a, and miR-16. A darker red color represents a stronger positive correlation (Pearson correlation coefficients closer to 1). (B) A darker green color represents significant correlations. The miR-16, miR-21, miR-9, and miR-429 of extracellular vesicles normalized by miR-484 were significantly correlated with those of breast cancer cells. \* $p < 0.05$ , \*\* $p < 0.01$ .

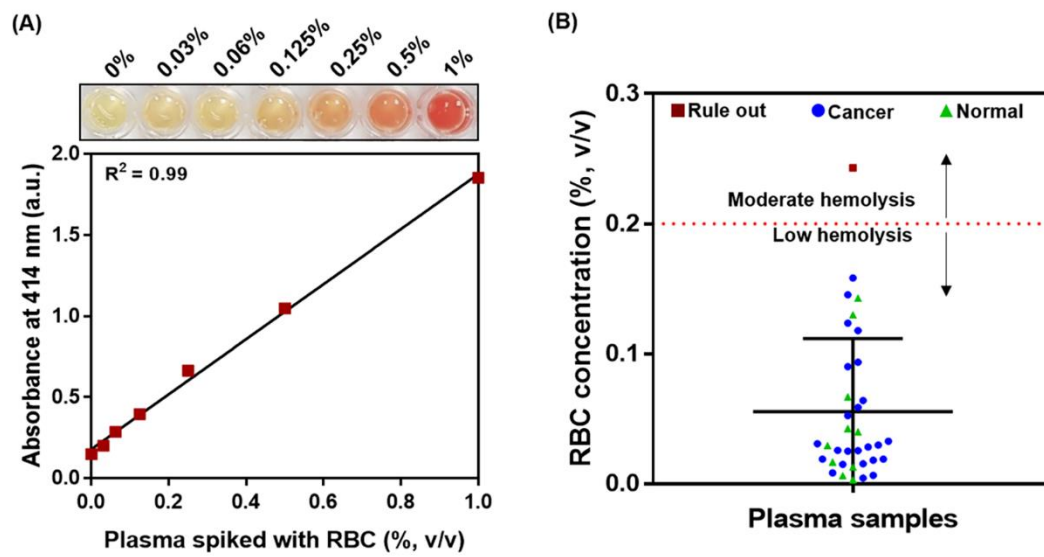

**Figure S3.** Evaluation of hemolysis of plasma samples prior to isolation of EVs to minimize the hemolysis-induced miRNA expression inhibition. (A) Standard curve of hemolysis at 414 nm of absorbance. (B) Condition of rule-out by RBC concentration in 32 representative plasma samples from total population.
